# Supplementary material for: A Novel Methodology for Assessing the Hygroscopicity of Aerosol Filter Samples
Source: Copernicus journal article supplement (doi:10.5194/egusphere-2024-2482), 2024-08-09
Supplement: Supplementary file 1 [file egusphere-2024-2482-supplement.pdf]

1 **Supplementary Material**

2 **For**

3 **A Novel Methodology for Assessing the Hygroscopicity of Aerosol Filter Samples**

4 **Nagendra Raparathi<sup>1</sup>, Anthony S. Wexler<sup>1,2,3,4</sup>, Ann M. Dillner<sup>1</sup>**

5 <sup>1</sup>Air Quality Research Center, University of California, Davis, 95616 CA, USA

6 <sup>2</sup>Mechanical and Aerospace Engineering, University of California, Davis, 95616 CA, USA

7 <sup>3</sup>Civil and Environmental Engineering, University of California, Davis, 95616 CA, USA

8 <sup>4</sup>Land, Air, and Water Resources, University of California, Davis, 95616 CA, USA

9  
10 *Correspondence to:* Ann M. Dillner (amdillner@ucdavis.edu)

31 **Table S1.** Air density and mass obtained for room and measured relative humidities (RHs) from  
 32 Psychrometric Chart

|                                        | 1st Day                                                            | 2nd day | 3rd day | 4th day | 5th day |
|----------------------------------------|--------------------------------------------------------------------|---------|---------|---------|---------|
| T (°C) - <i>Observed</i>               | 20.5                                                               | 21.2    | 20.3    | 19.7    | 19.5    |
| RH (%) - <i>Observed</i>               | 41.4                                                               | 63.9    | 52.4    | 37.2    | 49.8    |
| P (mm Hg) - <i>Observed</i>            | 767.6                                                              | 764.3   | 762.5   | 767.8   | 764.5   |
| <i>From Online Psychrometric Chart</i> | <b>Specific volume (m<sup>3</sup>/kg)</b>                          |         |         |         |         |
| Room                                   | 0.832                                                              | 0.843   | 0.839   | 0.828   | 0.833   |
| 84.3%                                  | 0.840                                                              | 0.847   | 0.845   | 0.837   | 0.840   |
| 90.8%                                  | 0.842                                                              | 0.848   | 0.847   | 0.838   | 0.841   |
| 97.5%                                  | 0.843                                                              | 0.850   | 0.848   | 0.840   | 0.842   |
| <i>Inverse of specific volume</i>      | <b>Air density (kg/m<sup>3</sup>)</b>                              |         |         |         |         |
| Room                                   | 1.202                                                              | 1.186   | 1.192   | 1.207   | 1.200   |
| 84.3%                                  | 1.190                                                              | 1.181   | 1.183   | 1.195   | 1.190   |
| 90.8%                                  | 1.188                                                              | 1.179   | 1.181   | 1.193   | 1.189   |
| 97.5%                                  | 1.186                                                              | 1.176   | 1.179   | 1.190   | 1.188   |
| <i>Mass (in µg)</i>                    | <b>Change in the mass (µg) of air from measured RHs to room RH</b> |         |         |         |         |
|                                        | 1st Day                                                            | 2nd day | 3rd day | 4th day | 5th day |
| 84.3%                                  | 233                                                                | 114     | 172     | 264     | 204     |
| 90.8%                                  | 245                                                                | 120     | 193     | 247     | 196     |
| 97.5%                                  | 293                                                                | 183     | 237     | 323     | 240     |

33

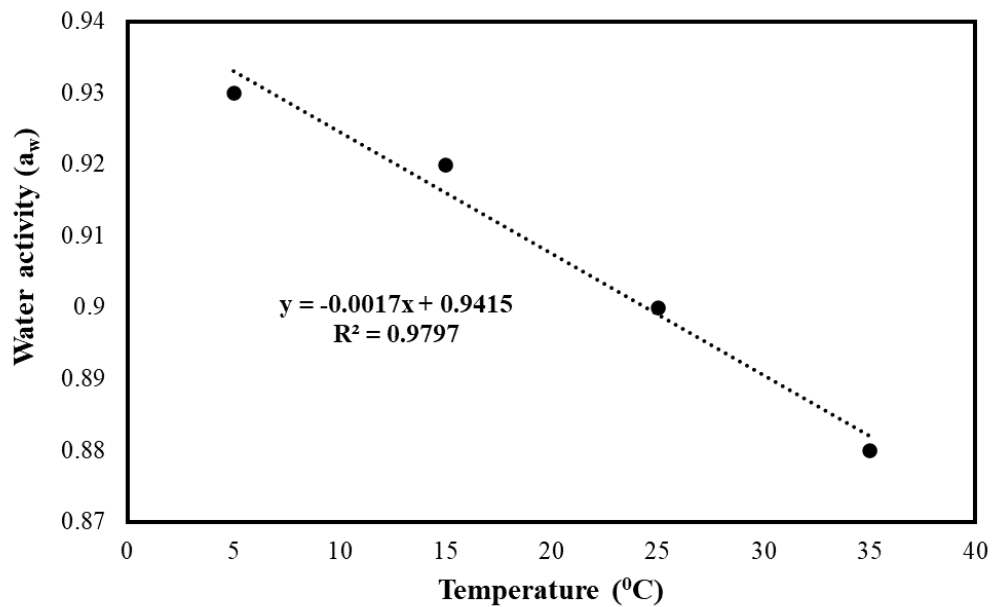

34

35 **Figure S1.** Water activity of saturate BaCl<sub>2</sub>·2H<sub>2</sub>O at different temperatures (Source: Wang et al.,  
 36 2012)

37

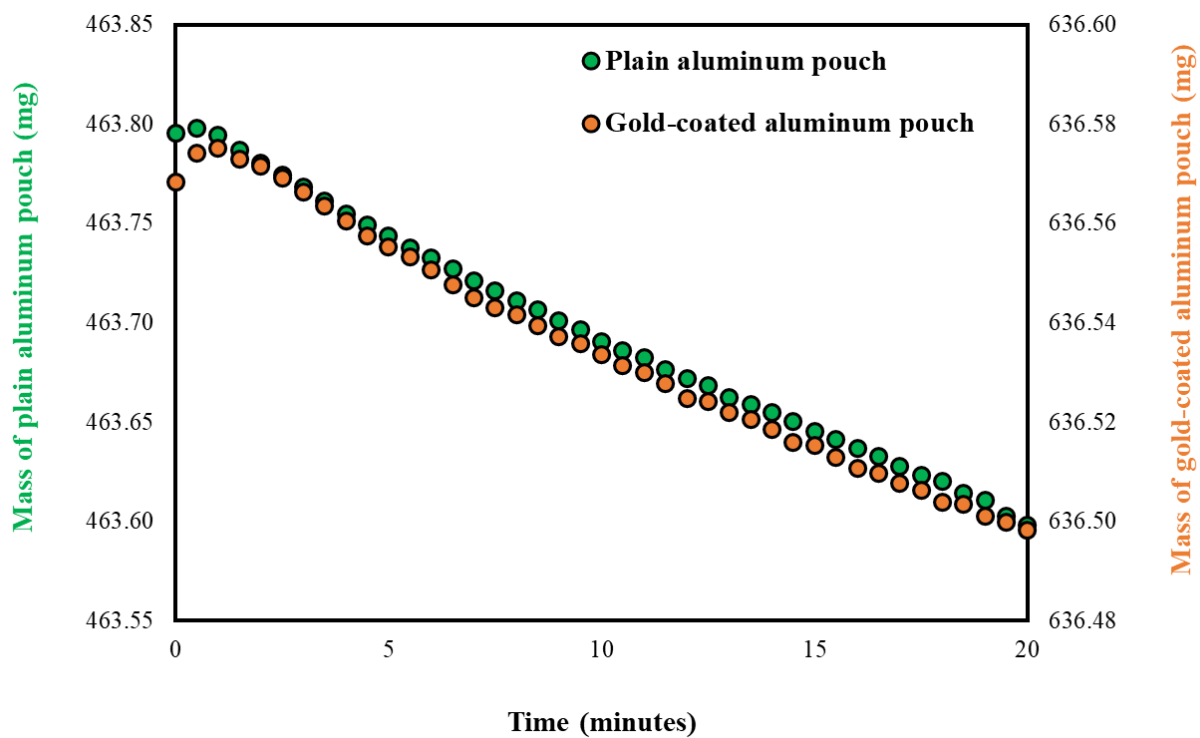

38

39 **Figure S2.** Comparison of the variation in wet weight of plain and gold-coated aluminum  
 40 pouches with loaded filters

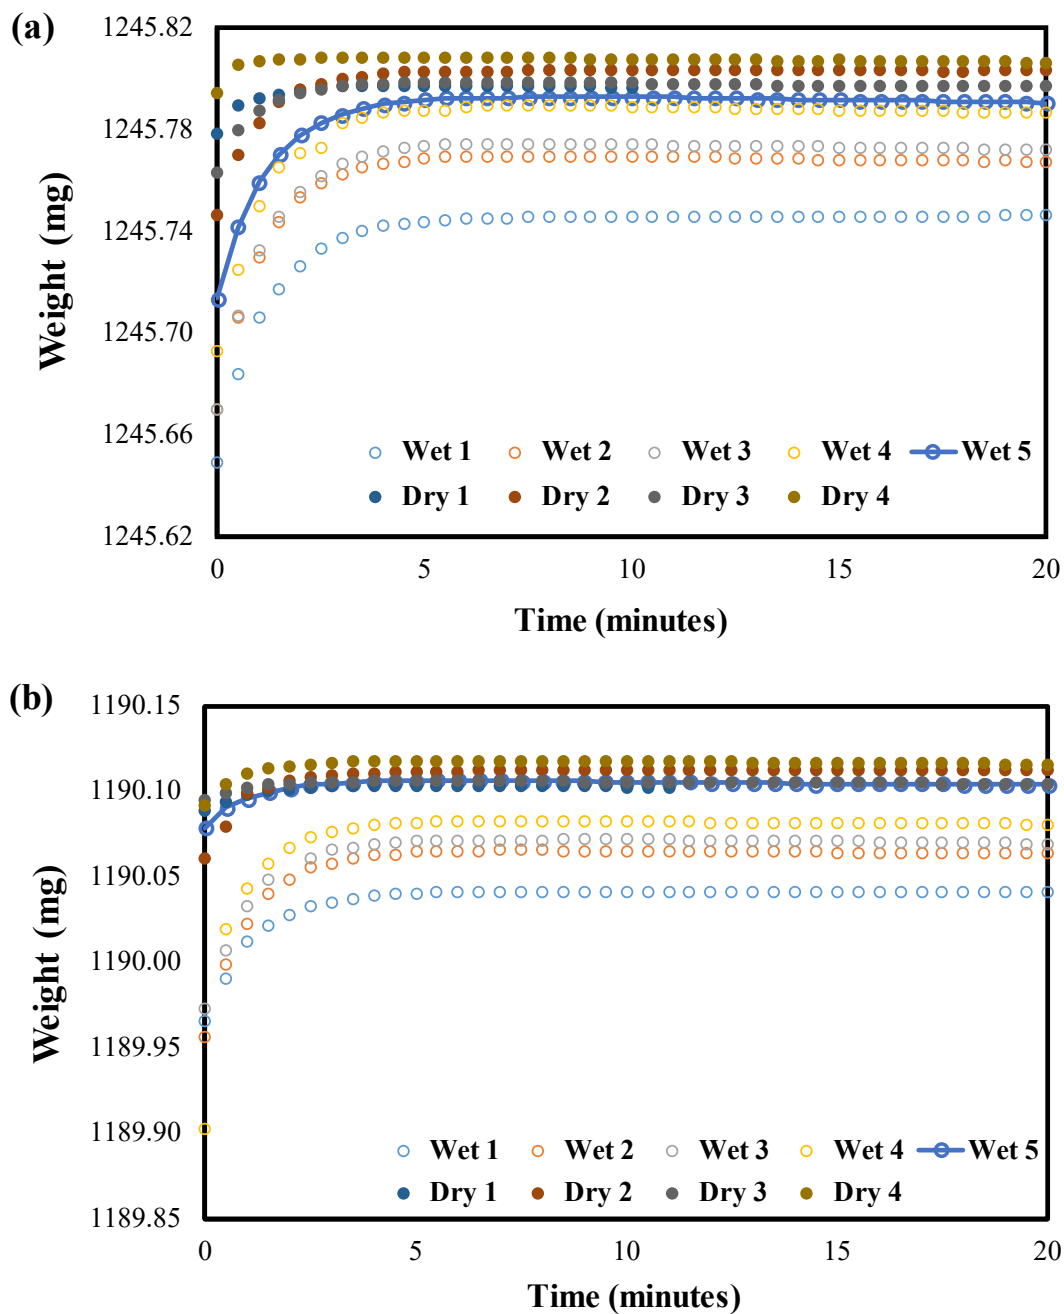

41  
 42 **Figure S3.** Variation in the weight of the plain aluminum pouch with a Teflon filter (a) 84.3%  
 43 and (b) 90.5% over time starting when the pouch is removed from the respective chamber and  
 44 placed on the balance. Hollow circles represent the transfer from the wet chamber to the balance,  
 45 while solid circles depict the transfer from the dry desiccator to the balance

46  
 47

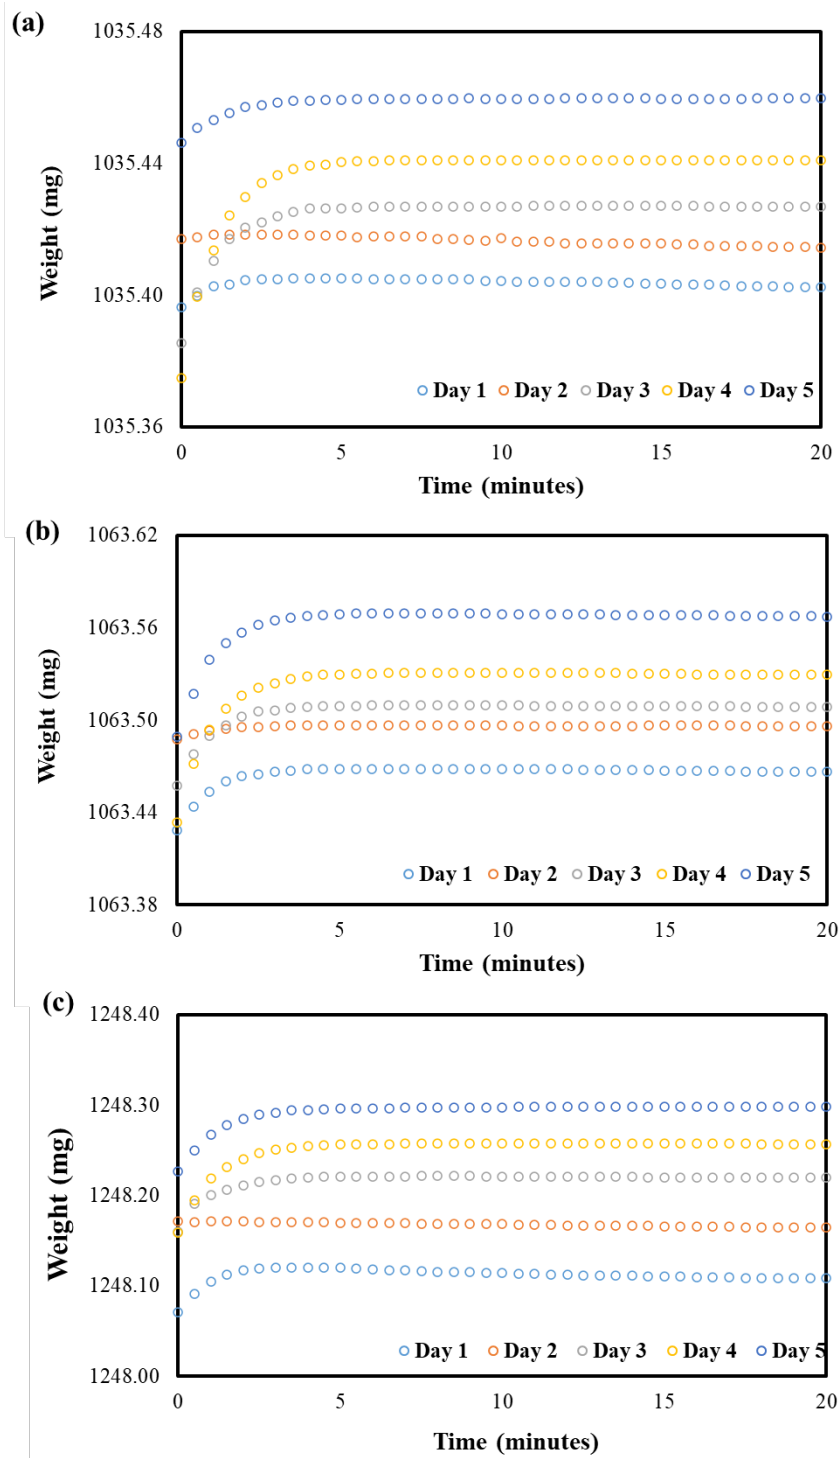

48

49 **Figure S4.** Variation in the wet weight of the plain aluminum pouch without a Teflon filter (a)  
 50 84.3%, (b) 90.8% and (c) 97.5% over time starting when the pouch is removed from the  
 51 respective chamber and placed on the balance.

52

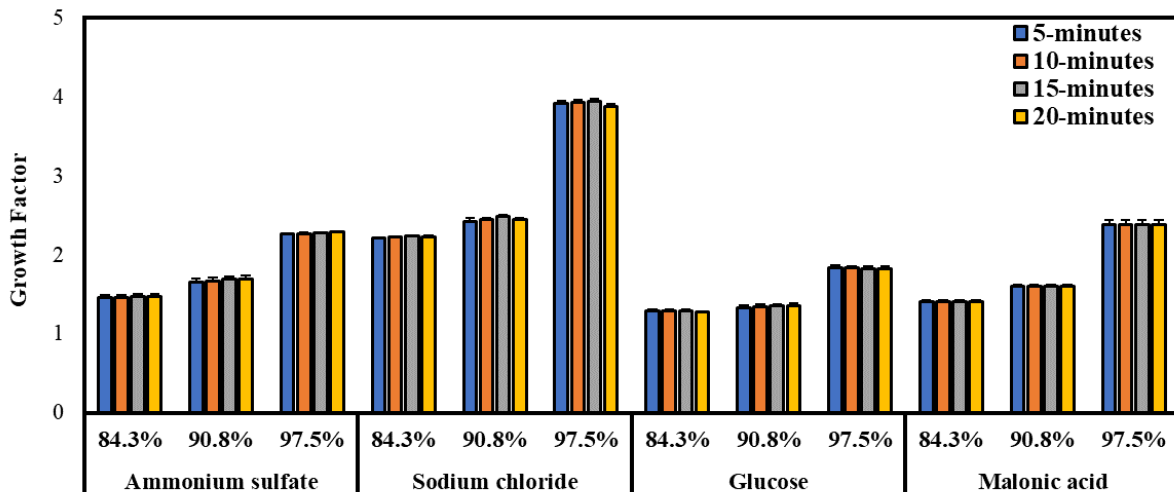

53

54 **Figure S5.** Comparison of estimated GFs from the 20 minutes wet weighing interval with the 5,  
 55 10, and 15-minute intervals. Error bar represents the standard deviation.

56

57
